# Supplementary material for: Gold nanoparticle probes for colorimetric detection of plasma galectin-3: a simple and rapid approach
Source: Royal Society of Chemistry journal article supplement (doi:10.1039/d3ay00347g), 2023-01-01
Supplement: d3ay00347g1.pdf [file d3ay00347g1.pdf]

## Supporting Information

### Gold Nanoparticle Probes for Colorimetric Detection of Plasma Galectin-3: A simple and rapid approach

Maria António<sup>1</sup>, Tânia Lima<sup>2,3</sup>, Rita Ferreira<sup>4,5</sup>, Margarida Fardilha<sup>2</sup>, José Mesquita Bastos<sup>2,6</sup> Rui

Vitorino<sup>2,5,7\*</sup> and Ana L. Daniel-da-Silva<sup>1 \*</sup>

<sup>1</sup>CICECO-Aveiro Institute of Materials, Department of Chemistry, University of Aveiro, 3810-193 Aveiro, Portugal;

<sup>2</sup>BiMED-Institute of Biomedicine, Department of Medical Sciences, University of Aveiro, Aveiro, 3810-193, Portugal

<sup>3</sup>Cancer Biology and Epigenetics Group, Research Center of Portuguese Oncology Institute of Porto (GEBC CI-IPOP) & Porto Comprehensive Cancer Center (P.CCC), 4200-072 Porto, Portugal.

<sup>4</sup>QOPNA, Department of Chemistry, University of Aveiro, 3810-193, Aveiro, Portugal

<sup>5</sup>LAQV-REQUIMTE, Chemistry Department, University of Aveiro, 3810-193, Aveiro, Portugal

<sup>6</sup>Cardiology Department, Hospital Infante D. Pedro, Centro Hospitalar do Baixo Vouga, Aveiro, Portugal

<sup>7</sup>UnIC@RISE, Department of Surgery and Physiology, Cardiovascular R&D Center, Faculty of Medicine of the University of Porto, Alameda Professor Hernâni Monteiro, 4200-319 Porto, Portugal

\* Correspondence: ana.luisa@ua.pt; Tel.: +351 234 370 368

**CONTENTS:**

|                                                                  |           |
|------------------------------------------------------------------|-----------|
| <b>S1. Characterization of modified Au NPs.....</b>              | <b>S3</b> |
| <b>S2. Detection of galectin-3 using Au NPs@MUDA@Ab@BSA.....</b> | <b>S5</b> |
| <b>S3. Galectin-3-antibody interaction.....</b>                  | <b>S7</b> |
| <b>S4. Time stability studies.....</b>                           | <b>S8</b> |
| <b>S5. Plasma samples analysis.....</b>                          | <b>S9</b> |
| <b>References.....</b>                                           | <b>S9</b> |

## S1. Characterization of modified Au NPs

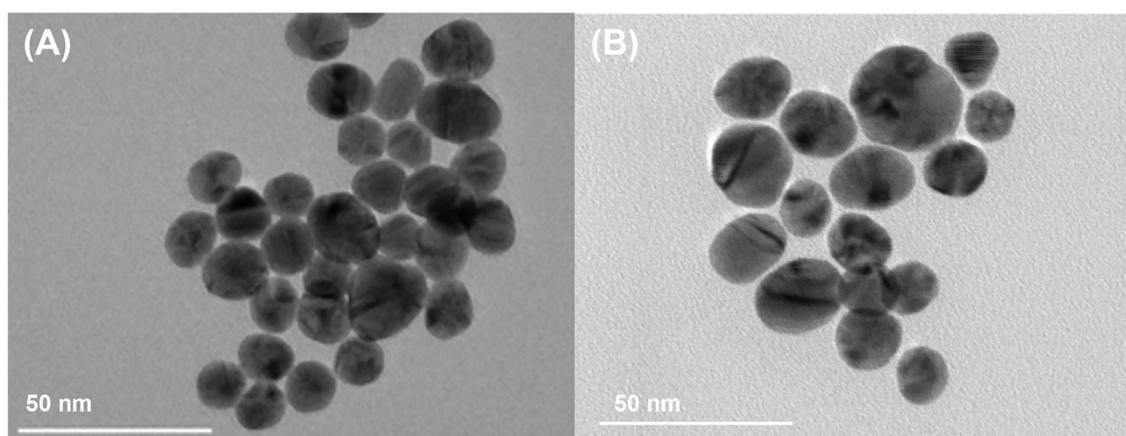

Fig. S1: TEM image of (A) Au NPs; (B) AuNPs@MUDA

**Table S1** Values of pH, Zeta potential (ZP), hydrodynamic diameter (HD) and polydispersity index (PDI) of bare and modified Au NPs

| Sample            | pH  | ZP (mV)         | HD (nm)         | PDI   |
|-------------------|-----|-----------------|-----------------|-------|
| Au NPs            | 5.8 | $-59.3 \pm 1.7$ | $24.7 \pm 0.5$  | 0.356 |
| AuNPs@MUDA        | 7.2 | $-73.1 \pm 2.6$ | $65.5 \pm 0.4$  | 0.454 |
| AuNPs@MUDA@Ab     | 7.0 | $-29.7 \pm 0.4$ | $111.3 \pm 0.6$ | 0.301 |
| AuNPs@MUDA@Ab@BSA | 7.0 | $-30.5 \pm 1.2$ | $103.6 \pm 0.1$ | 0.290 |

The ATR-FTIR spectrum of Ab was acquired to investigate the binding of Ab to AuNPs@MUDA. The ATR-FTIR spectrum of Ab is complex due to the presence of PBS, gelatin, and sodium azide. According to the supplier the Ab was in a PBS solution with 0.1%.

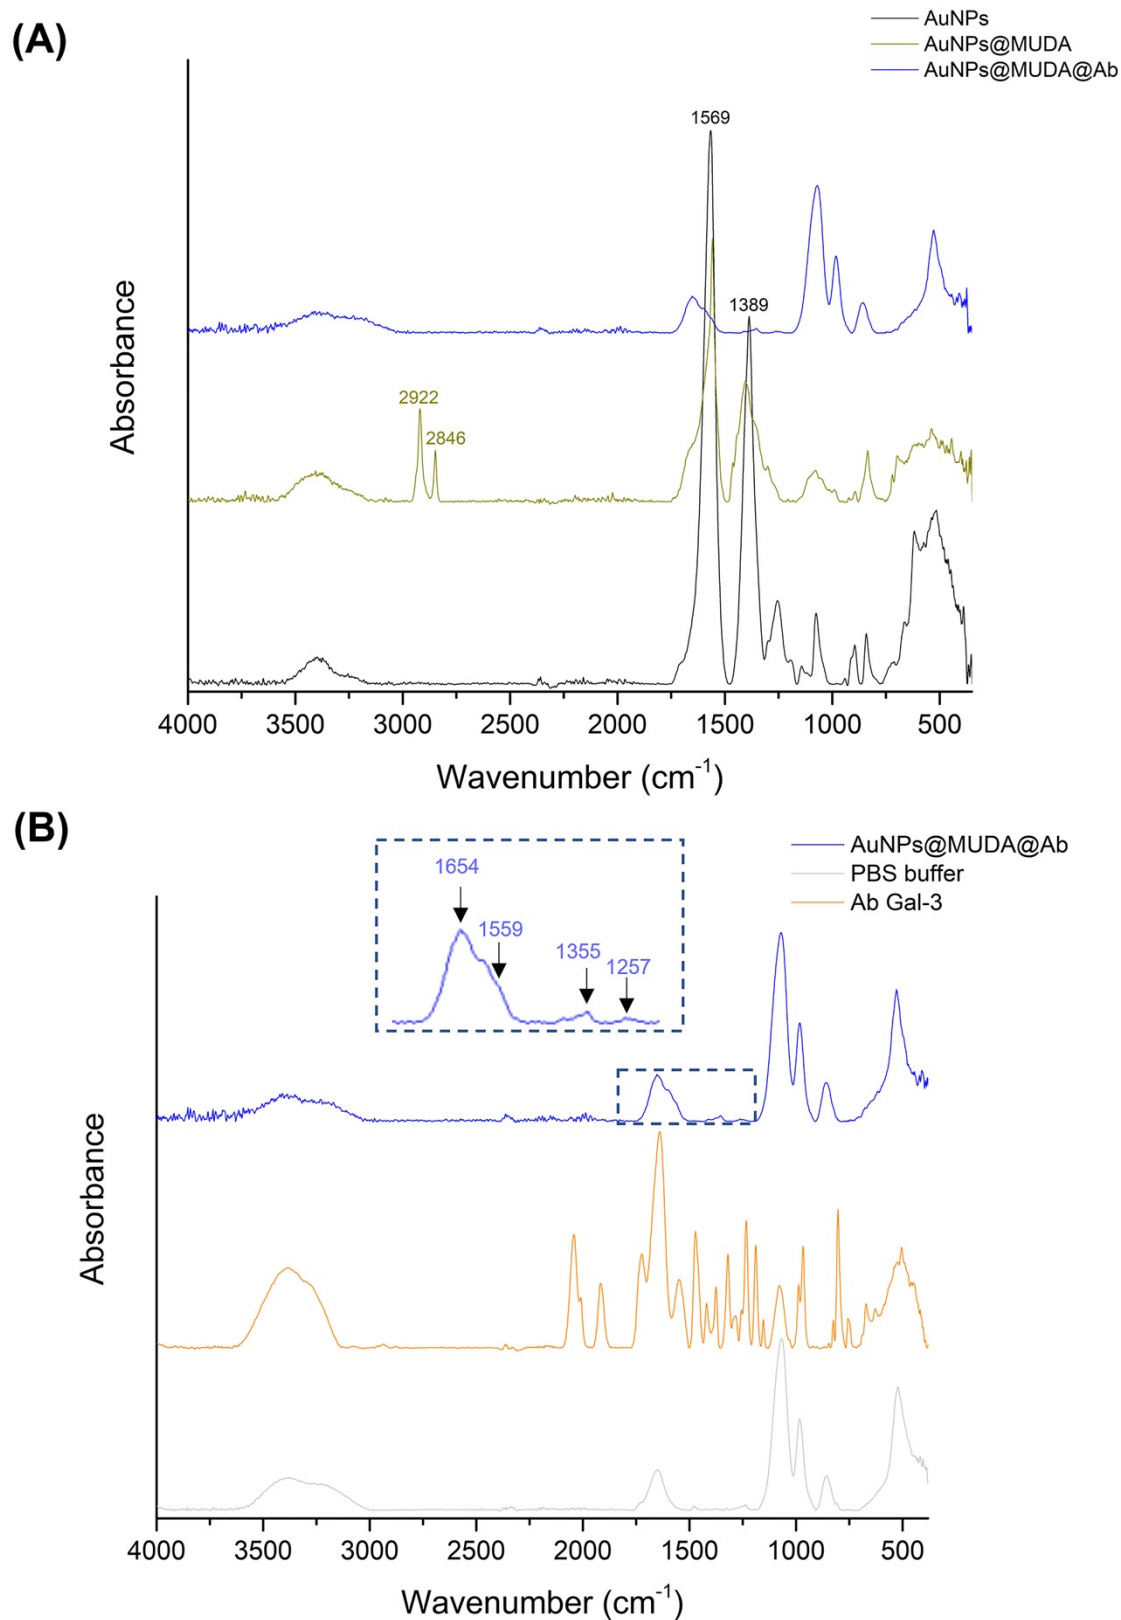

**Fig. S2: (A)** ATR-FTIR spectra of **(A)** Au NPs, AuNPs@MUDA and Au NPs@MUDA@Ab, and **(B)** PBS buffer, Ab Gal-3 and Au NPs@MUDA@Ab.

## S2. Detection of galectin-3 using Au NPs@MUDA@Ab@BSA

**Table S2:** Hydrodynamic diameter (HD) and polydispersity index (PDI) values of modified AuNPs after incubation with Gal-3 at the concentration of 0, 40 and 160  $\mu\text{g}\cdot\text{L}^{-1}$  in PBS buffer

| Galectin-3 ( $\mu\text{g}\cdot\text{L}^{-1}$ ) | HD (nm)         | PDI   |
|------------------------------------------------|-----------------|-------|
| 0                                              | $121.9 \pm 1.4$ | 0.310 |
| 40                                             | $332.9 \pm 4.6$ | 0.518 |
| 160                                            | $422.6 \pm 3.8$ | 0.708 |

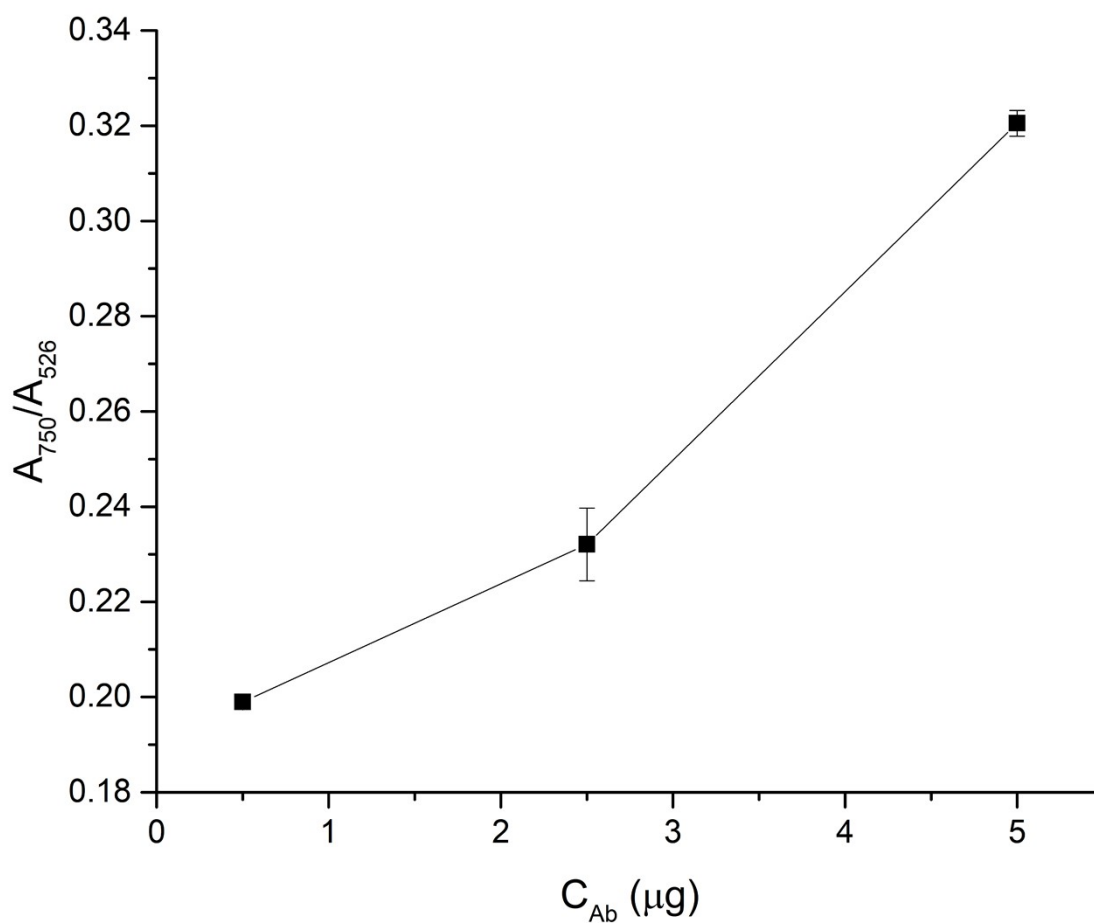

**Fig. S3:** AR of Au NPs@MUDA@Ab@BSA prepared with 0.5, 2.5 and 5  $\mu\text{g}$  of galectin-3 antibody (Ab) after incubation with Gal-3 ( $80 \mu\text{g}\cdot\text{L}^{-1}$  concentration and incubation time of 60 minutes).

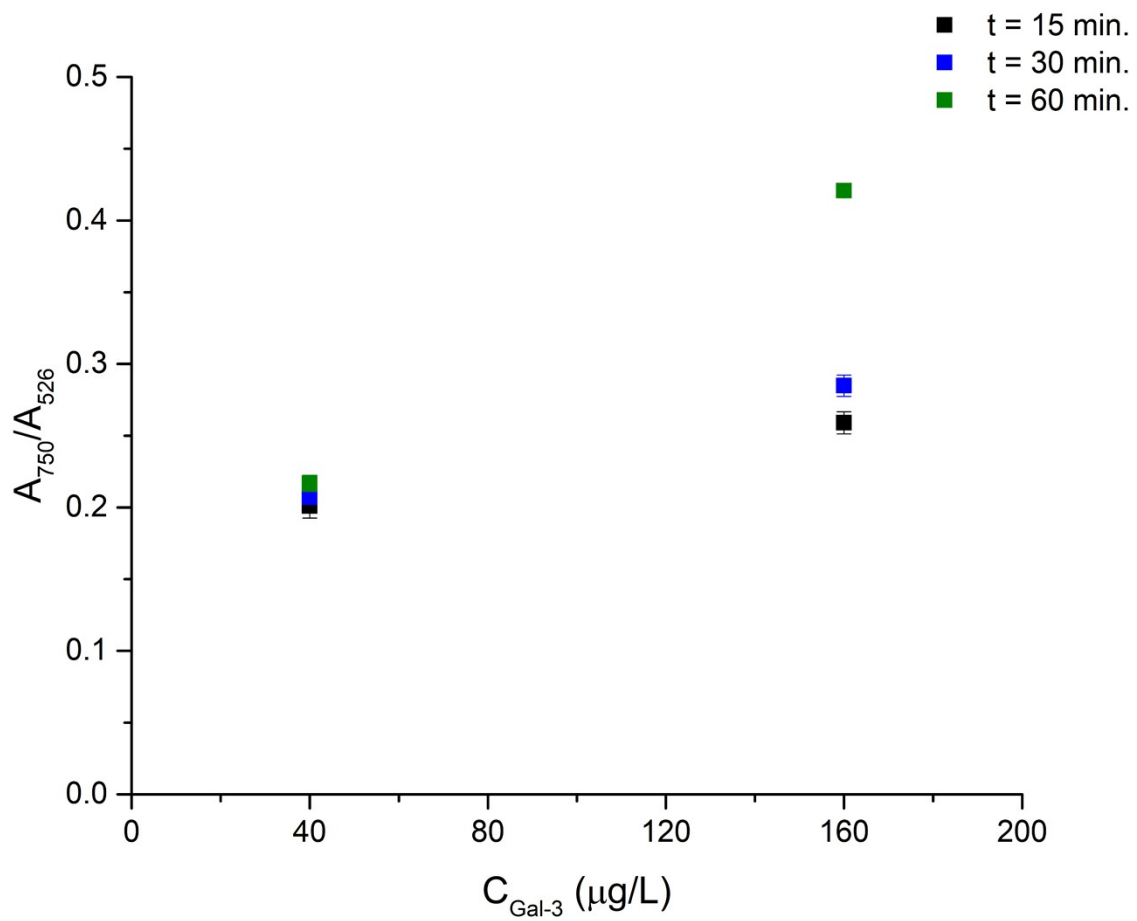

**Fig. S4:** AR of Au NPs@MUDA@Ab@BSA for 40 and 160  $\mu\text{g}\cdot\text{L}^{-1}$  of galectin-3 after incubation for 15, 30 and 60 minutes.

### S3. Galectin-3-antibody interaction

The dissociation constant ( $k_d$ ) for the AuNPs@MUDA@Ab-Gal-3 was calculated from the variation of  $A_{750}/A_{526}$  ratio with over the final concentration of Gal-3 in different solutions, the saturation curves <sup>1</sup>. The  $k_D$  value was obtained using the GraphPad Prism software version 8.4.2 and intending that the Gal-3 was able to bind at one specific site, to the antibody. The one site-specific binding equation (**equation S1**) from the software was used. The Y corresponds to the  $A_{750}/A_{526}$  ratio, x to the Gal-3 concentrations ( $\mu\text{g.L}^{-1}$ ) and  $B_{\text{max}}$  is the maximum specific binding.

$$Y = (B_{\text{max}} \cdot x) / (k_d + x) \quad (\text{S1})$$

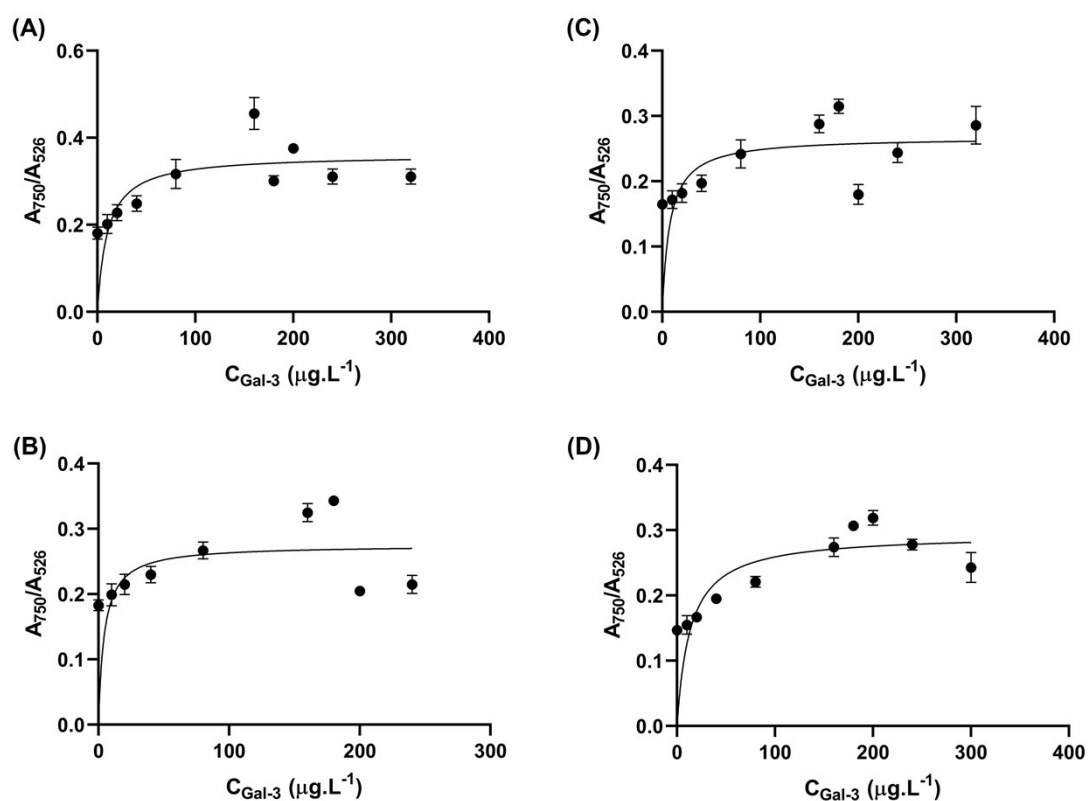

**Fig. S5:** The fitting curve (solid line) of equation (S1) to determine the dissociation constant  $k_d$  of the galectin-3-antibody: **(A)** in buffer, **(B)** diluted saliva, **(C)** 6 protein mixture and **(D)** diluted fetal bovine serum.

#### S4. Time stability studies

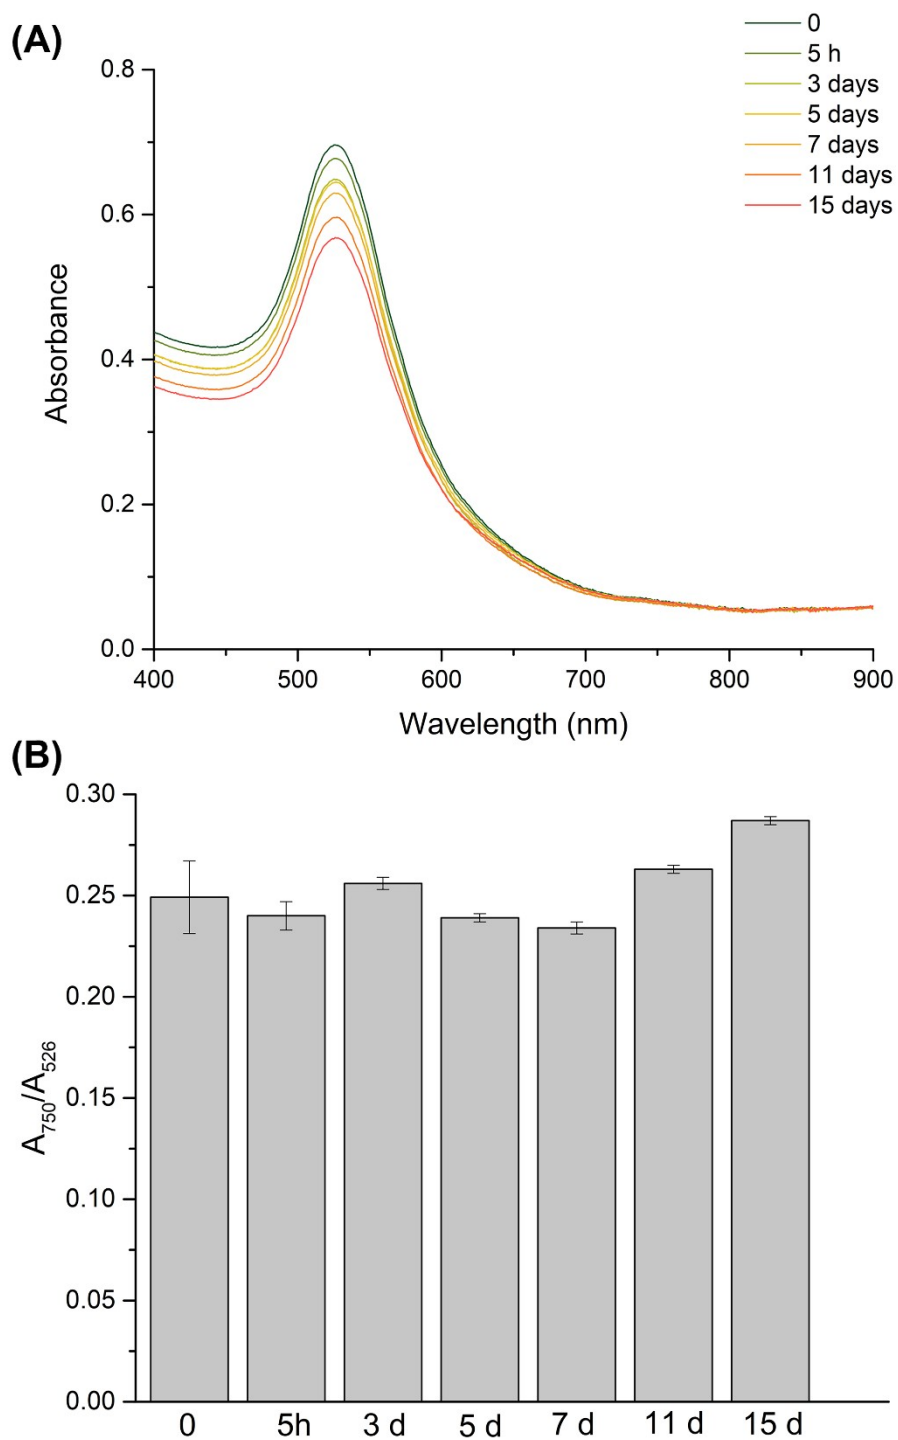

**Fig. S6:** (A) UV-VIS spectra of AuNPs@MUDA@Ab@BSA colloid, after storage at 4°C for different periods after synthesis (in the absence of galectin-3); (B) AR upon detection of 40  $\mu\text{g}\cdot\text{L}^{-1}$  galectin-3, using AuNPs@MUDA@Ab@BSA probes stored at 4°C after synthesis for 0 hours, 5 hours, 3 days, 5 days, 7 days, 11 days and 15 days.



## S5. Plasma samples analysis

**Table S3:** Concentration of galectin-3 by the developed method, adj. vol. from western and their respective ratio for each analyzed plasma sample

| Sample | Proposed method                          |       | Western blot |       |
|--------|------------------------------------------|-------|--------------|-------|
|        | C <sub>Gal-3</sub> (µg.L <sup>-1</sup> ) | Ratio | Adj.Vol.     | Ratio |
| P0     | 280.5                                    | 1     | 32.5         | 1     |
| P1     | 260.3                                    | 1.08  | 27.7         | 1.17  |
| C2     | 143.9                                    | 1.95  | 16.3         | 1.99  |
| C3     | 233.6                                    | 1.20  | 24.6         | 1.32  |

## References

- 1 M. António, R. Ferreira, R. Vitorino and A. L. Daniel-da-Silva, *Talanta*, 2020, **214**, 120868.
